# Supplementary material
Source: publisher figshare collection journal article supplement (https://karger.figshare.com/ndownloader/files/27948780)
Supplement: Supplementary file 1 [file 27948780]

**Supplementary Fig. S2.** Sequences of ManDra-A and each repeat unit in the ManDra-A 5 repeat region. The upper sequence indicates ManDra-A, and the lower sequence indicates each repeat unit of ManDra-A 5 repeat. Units 1 and 2 contain partial ManDra-A sequences. Red characters indicate different bases compared to the ManDra-A reference sequence. Hyphens (-) indicate base deletions.

**Supplementary Fig. S2.** Continued.
